# Supplementary material for: Committing Cytomegalovirus-Specific CD8 T Cells to Eliminate Tumor Cells by Bifunctional Major Histocompatibility Class I Antibody Fusion Molecules
Source: Oxford University Press journal article supplement (doi:10.1158/2326-6066.cir-15-0037), 2015-02-18
Supplement: 23266066cir150037-sup-144887_0_supp_2847370_nj74lf.doc [file 23266066cir150037-sup-144887_0_supp_2847370_nj74lf.doc]

**Committing cytomegalovirus-specific CD8 T cells to eliminate tumor cells by bifunctional major histocompatibility class I antibody fusion molecules**

Martina Schmittnaegel1, Victor Levitsky2, Eike Hoffmann1, Guy Georges1, Olaf Mundigl1, Christian Klein2, Hendrik Knoetgen1

**Authors' Affiliations**: ROCHE Pharma Research and Early Development: 1Large Molecule Research, ROCHE Innovation Center Penzberg, Germany; 2Discovery Oncology, ROCHE Innovation Center Zurich, Switzerland;

**Corresponding Author**: Hendrik Knoetgen, ROCHE Pharma Research and Early Development: Large Molecule Research, ROCHE Innovation Center Penzberg, Nonnenwald 2, 82377 Penzberg, Germany. Phone: +49 8856 605657; Fax: +49 8856 60795657; E-mail: hendrik.knoetgen@roche.com

**Supplementary Material**

**Supplementary Table 1:** **Surface marker analysis of % of CMV-pp65-specific CD8+ T cells from freshly isolated PBMC from CMV and HLA-A*0201 positive donors.** In total,bloodfrom more than two hundred donors was analyzed. 35% of the donors expressed HLA A*0201. We selected eleven donors for more detailed analysis which were negative for CD8+ T cells recognizing the EBV-derived peptide (BMLF-1 (280-288)) and positive for CD8+ T cells recognizing the CMV-derived peptide (pp65 (495-503)). The detection limit using conservative gates was set to be 0.01% of PBMCs. PBMC from eight of eleven donors were isolated via Ficoll gradient centrifugation and analyzed by multi-color flow cytometry for surface marker expression on CMV-pp65-specific CD8+ T cells with directly labeled antibodies anti-CD8 PE-Cy7 (Becton Dickinson), anti-CD4 FITC (Becton Dickinson), anti-CD69 PerCP Cy5.5 (BioLegend), anti-CD25 PE, PerCP Cy5.5 (BioLegend), anti- CD127 Alexa488 (BioLegend), anti-PD-1 FITC (BioLegend), anti-CD45 RO FITC (Becton Dickinson), anti-CD62L PE (Becton Dickinson), anti-CCR7 PerCPCy5.5 (BioLegend), anti-CD57 FITC (BioLegend), anti-CD103 PE (BioLegend), anti-CXCR3 PerCP-Cy5.5 (BioLegend), and HLA-A*0201 Dextramers, CMV (NLVPMVATV) or EBV (GLCTLVAML) labeled with APC (Immundex). Gating was performed on CD8+, HLA-A*0201/NLVPMVATV Dextramer + cells. PBMC were analyzed for CMV-pp65-specific CD8+ T cells within PBMC (second row) and CD8+ T cells (third row). CD45RO, CD62L staining was performed for grouping in T naive (CD45RO-, CD62L+) , T CM (CD45RO+, CD62L+) T EM (CD45RO+, CD62L-) T EMRA (CD45RO-, CD62L-) cells. Percentage of cells staining positive for CD25, CD69, CD57, PD-1, CD127 and CXCR3 is indicated in the respective row.

**Supplementary Figure S1: Pharmacokinetic analysis of CMV-pMHCI-IgG in serum of SCID beige mice.** SCID beige mice were injected i.p. with respective concentrations [2 mg/kg (circles), 1 mg/kg (squares), or 0.1 mg/kg (triangles)] of CMV-pMHCI-IgG. Serum was collected at different point in time (16, 48, 120, 192 hours as indicated on x-axis) and analyzed with ELISA (enzyme-linked immunosorbent assay) detecting human IgG. x-Axis shows time in hours [h], y-axis shows human IgG in serum in [ng/ml]. Half-life for beta phase (48-192h) in a two phase decay model was calculated using exponential regression.

**Supplementary Figure S2: Functional analysis of CMV-pMHCI-IgG from serum of SCID beige mice.** Serum of SCID beige mice which were injected i.p. with 2 mg/kg of CMV-pMHCI-IgG was collected 16 hours after compound injection. Functional activity was tested in the standard xCELLigence cytotoxicity assay. Lysis of MCSP+ tumor cells (Colo38) using xCELLigene system with stimulated and expanded human CMV-pp65-specific CD8+ T cells in an effector to target cell ratio of 3:1. CMV-pMHCI-IgG containing serum was diluted 1:3 in the assay and compared to CMV-pMHCI-IgG at final concentrations of 5 nM, 0.5 nM, 0.05 nM, 0.005 nM (columns indicated on x-axis). Expected concentration in serum for a 2 mg/kg dose after 16 hours was about 7.5 nM +/- 1.5 nM (Figure S1). The functional activity of the serum was in the expected range 0.5 to 5 nM, which corresponds to a concentration of 1.5 to 15 nM in undiluted serum. Specific lysis (y-axis) was analyzed and calculated in percent [%] after 30 hours. Error bars show standard deviation of replicates (n=2).

**Supplementary Figure S3: Time-lapse fluorescence microscopy analysis of T cell mediated killing of tumor cells by CMV-pp65-specific T cells using pMHCI-IgG.** Time-lapse fluorescence microscopy of CMV-pp65-specific T cell mediated killing of MCSP+ tumor cells (Colo38) incubated with 15nM of CMV-pMHCI-IgG (left) or EBV-pMHCI-IgG (right) as control. Constructs are indicated in the respective panel. T cells are stained in red (PKH-26, Sigma), tumor cells in green (CMFDA, LifeTechnologies). Effector to target ratio was 3:1. Real-time is indicated in the lower left corner in h:m:s:ms (h=hours, m=minutes, s=seconds, ms=milliseconds), scale bar is shown in the lower right corner 0-50 µm (µm=micrometre).

**Supplementary Table 1**

| **Donor** | **1** | **2** | **3** | **4** | **5** | **6** | **7** | **8** | **9** | **10** | **11** | **ø** |
| --- | --- | --- | --- | --- | --- | --- | --- | --- | --- | --- | --- | --- |
| **CMV-pp65 (NLVPMVATV)  of all CD8+  [%]** | 11,3 | 1,8 | 0,68 | 0,91 | 0,51 | 0,79 | 0,47 | 0,86 | 0,56 | 5,6 | 2,0 | 2,3 |
| **CMV-pp65 (NLVPMVATV)  of all PBMCs [%]** | 3,3 | 0,4 | 0,02 | 0,01 | 0,07 | 0,13 | 0,03 | 0,3 | 0,09 | 1,3 | 0,5 | 0,6 |
| **CD8+,Dextramer+ (NLVPMVATV) T cells:** | | | | | | | | | | | | |
| **T naive (CD45RO-, CD62L+) [%]** | 5,4 | 3,1 |  |  | 7,9 | 18,7 | 34,9 | 3,7 | 15,5 | 5,3 |  | 11,8 |
| **TCM (CD45RO+, CD62L+) [%]** | 9,6 | 40,7 |  |  | 16,2 | 15,7 | 7,3 | 19,9 | 23,9 | 30,7 |  | 20,5 |
| **TEM (CD45RO+, CD62L-) [%]** | 25,5 | 36,2 |  |  | 40,3 | 24,7 | 5,5 | 55,2 | 49,3 | 54,0 |  | 36,6 |
| **TEMRA (CD45RO-, CD62L-) [%]** | 35,8 | 6,6 |  |  | 24,1 | 27,7 | 39,4 | 8,6 | 4,2 | 10,0 |  | 19,6 |
| **CD25+  [%]** | 0,7 | 2,3 |  |  | 7,5 | 4,0 | 3,3 | 3,0 | 2,8 |  |  | 3,4 |
| **CD69+  [%]** | 2,3 | 1,5 |  |  | 5,6 | 4,3 | 1,8 | 5,0 | 6,0 |  |  | 3,8 |
| **CD57+  [%]** | 69,4 | 92,3 |  |  | 81,9 | 69,9 | 69,9 | 83,4 | 51,8 |  |  | 74,1 |
| **PD-1+  [%]** | 43,6 | 59,6 |  |  | 42,0 | 22,4 | 35,2 | 50,0 | 58,6 | 26,9 |  | 42,3 |
| **CD127+  [%]** | 57,6 | 34,3 |  |  | 39,3 | 37,3 | 39,8 | 37,7 | 54,2 |  |  | 42,9 |
| **CXCR3+ [%]** | 93,6 | 90,8 |  |  | 83,1 | 89,7 | 87,3 | 91,1 | 96,0 |  |  | 90,2 |

**Supplementary Figure S1**

**Supplementary Figure S2**

**Supplementary Figure S3**

*Movies are provided separately*

**Supplementary Methods**

**Protein purification**

Protein purification from the culture supernatant was performed by protein A affinity chromatography using HiTrap MabSelect SuRe columns (GE Healthcare) followed by size exclusion chromatography on HiLoad 16/60 Superdex 200 pg columns (GE Healthcare) and subsequently analyzed by SDS-PAGE, size exclusion chromatography and electrospray ionization mass spectrometry.

**Flow cytometry**

Cells were stained directly with fluorochrome-conjugated monoclonal antibodies (mAb) at the respective concentrations given in the manufacturer’s protocols. For binding analysis of pMHCI-IgGs, tumor cells were stained with pMHCI-IgG constructs in concentrations of 0.005 to 25 nM followed by secondary anti-human IgG(H+L) PE (Jackson ImmunoResearch) or anti-human HLA-A2 FITC (Becton Dickinson). Compensation was conducted using single-stained antibody-capturing beads (CompBeads, BD Biosciences). Flow cytometric analyses were performed using a FACSCanto II (BD Biosciences). Data were analyzed using FlowJo (TreeStar) or FACSDiva Software (BD Biosciences).

**Time lapse live cell imaging by confocal microscopy**

Tumor cells were plated at 50,000 cells/well in 500 µl culture medium on Lab-TekII 8-well chamber slides (Nunc) coated with poly-ornithine. After 24 hours, tumor cells were labeled with 5 µM CMFDA (LifeTechnologies) for 15 min, washed with serum-free AIM-V Medium (LifeTechnologies) and 200 µl AIM-V Medium was added. 2x10e6 human CMV-pp65-specific CD8+ T cells were stained with 2 µM PKH26-GL (Sigma Aldrich) for 10 min. Reactions were stopped with 200 µl FBS, cells were centrifuged at 400 g for 10 min and resuspended in AIM-V. The final effector to target cell ratio used was 3:1. pMHCI-IgGs were added at a concentration of 15 nM. Time-lapse fluorescence imaging was performed on a LEICA SP5x confocal microscope (Leica Microsystems) using white-light laser excitation at *497* and *578* nm, respectively (at 63x/1.2NA water immersion). Selective spectral emission detection by low-noise detectors (HyD) was performed in sequential scanning mode using 505-549 bandpass for CMFDA and 557-637 bandpass for PKH-26. The detection pinhole size was set to 1 Airy unit (AU); voxel size, 240 nm. During the time lapse, cells were maintained at 37°C/5% CO2 on a microscope stage incubator. Images were collected every 68 sec for 4-5 h.

**Stimulation of PBMCs with homo-and heterodimeric CMV-pMHCI-IgGs**

Freshly isolated PBMCs were incubated with CMV-pMHCI-IgGs containing either one or two pMHCI-complexes in concentrations from 0.5 to 50 nM. After 16 hours, cells were stained with anti-CD8 PE-Cy7 (BD) and HLA-A*0201 CMV (NLVPMVATV) Dextramer (Immudex) to measure downregulation of TCR and with anti-CD25 PE (BioLegend) or anti-CD69 PerCP Cy5.5 (BioLegend) and analyzed in FACS Canto II.

**Pharmacokinetic measurement**

SCID beige mice (n=3) were injected i.p. with different concentrations (2 mg/kg, 1 mg/kg, 0.1 mg/kg) of CMV-pMHCI-IgG. Serum was collected at different timepoints (16, 48, 120, 192 hours) via retroorbital blood collection and serum was extracted using 500 μl gel-monovettes (Sarstedt). Serum was analyzed with human IgG ELISA Kit (Bethyl Laboratories, Inc.) according to the manufacturer’s protocol. Quantification in nanogram per milliliter [ng/ml] was performed with standard calibration curves according to the manufacturer’s protocol. Absorbance was detected in ELISA-photometer at 450 nm (TECAN). Half-life for beta phase (48 – 192 hours) was calculated using exponential regression in two phase decay model.

**Supplementary Protein Sequences**

**Protein sequences of MCSP binding construct M4-3ML2**

**pMHCI-IgG full antibody heavy chain fusion [hole]**

**Aminoacid 1-22:** Signal peptide, **23-31:** CMV pp65 (495-503), **32-46:** Linker 1 (G4S)3, **33/249:** disulfide stabilization peptide linker/MHCI (**33:**G11C/**249:** Y227C), **47-145:** ß2M, **146-165:** Linker 2 (G4S)4, **166-439:** a1-a3 HLA-A*0201, **440-441:** Linker 3 (GS), **442-553:** variable region humanized MCSP binder (M4-3ML2), **554-651**: CH1 IgG1, **652-663:** Hinge, **664-776:** CH2, **777-883**: CH3, **670:** L234A**/671:** L235A (LALA), **765:** P329G (PG), **785:** Y349C**, 802:** T366S, **804:** L368A, **843:** Y407V

1 mdmrvpaqll gllllwfpga rcnlvpmvat vgcggsgggg sggggsiqrt pkiqvysrhp

61 aengksnfln cyvsgfhpsd ievdllknge riekvehsdl sfskdwsfyl lyyteftpte

121 kdeyacrvnh vtlsqpkivk wdrdmggggs ggggsggggs ggggsgshsm ryfftsvsrp

181 grgeprfiav gyvddtqfvr fdsdaasqrm eprapwieqe gpeywdgetr kvkahsqthr

241 vdlgtlrgcy nqseagshtv qrmygcdvgs dwrflrgyhq yaydgkdyia lkedlrswta

301 admaaqttkh kweaahvaeq lraylegtcv ewlrryleng ketlqrtdap kthmthhavs

361 dheatlrcwa lsfypaeitl twqrdgedqt qdtelvetrp agdgtfqkwa avvvpsgqeq

421 rytchvqheg lpkpltlrwg sqvqlqesgp glvkpsqtls ltctvsggsi tsgyywnwir

481 qhpgkglewi gyitydgsnn ynpslksrvt isrdtsknqf slklssvtaa dtavyycadf

541 dywgqgtlvt vssastkgps vfplapssks tsggtaalgc lvkdyfpepv tvswnsgalt

601 sgvhtfpavl qssglyslss vvtvpssslg tqtyicnvnh kpsntkvdkk vepkscdkth

661 tcppcpapea aggpsvflfp pkpkdtlmis rtpevtcvvv dvshedpevk fnwyvdgvev

721 hnaktkpree qynstyrvvs vltvlhqdwl ngkeykckvs nkalgapiek tiskakgqpr

781 epqvctlpps rdeltknqvs lscavkgfyp sdiavewesn gqpennyktt ppvldsdgsf

841 flvskltvdk srwqqgnvfs csvmhealhn hytqkslsls pgk*

**Heavy chain (bivalent construct) [knob]**

**1-19:** Signal peptide, **20-131:** variable region humanized MCSP binder (M4-3ML2), **132-229:** CH1, **230-241:** Hinge, **242-354:** CH2, **355-461:** CH3, **248:** L234A **/249:** L235A (LALA), **343:** P329G (PG), **368:** S354C, **380:** T366W

1 mdwtwrilfl vaaatgahsq vqlqesgpgl vkpsqtlslt ctvsggsits gyywnwirqh

61 pgkglewigy itydgsnnyn pslksrvtis rdtsknqfsl klssvtaadt avyycadfdy

121 wgqgtlvtvs sastkgpsvf plapssksts ggtaalgclv kdyfpepvtv swnsgaltsg

181 vhtfpavlqs sglyslssvv tvpssslgtq tyicnvnhkp sntkvdkkve pkscdkthtc

241 ppcpapeaag gpsvflfppk pkdtlmisrt pevtcvvvdv shedpevkfn wyvdgvevhn

301 aktkpreeqy nstyrvvsvl tvlhqdwlng keykckvsnk algapiekti skakgqprep

361 qvytlppcrd eltknqvslw clvkgfypsd iavewesngq pennykttpp vldsdgsffl

421 yskltvdksr wqqgnvfscs vmhealhnhy tqkslslspg k*

**Short heavy chain (monovalent construct) [knob]**

**Aminoacid 1-22:** Signal peptide, **23-34:** Hinge, **35-147:** CH2, **148-254:** CH3, **27:** C220A, **41:** L234A/**42:** L235A (LALA), **136:** P329G (PG), **161:** S354C, **173:** T366W

1 mdmrvpaqll gllllwfpga rcepksadkt htcppcpape aaggpsvflf ppkpkdtlmi

61 srtpevtcvv vdvshedpev kfnwyvdgve vhnaktkpre eqynstyrvv svltvlhqdw

121 lngkeykckv snkalgapie ktiskakgqp repqvytlpp crdeltknqv slwclvkgfy

181 psdiavewes ngqpennykt tppvldsdgs fflyskltvd ksrwqqgnvf scsvmhealh

241 nhytqkslsl spgk*

**Light chain:**

**1-22:** Signal peptide **23-130:** variable region, **131-236:** constant region, κ (kappa)

1 mdmrvpaqll gllllwfpga rcdiqmtqsp sslsasvgdr vtitcrasqg irnylnwyqq

61 kpgkapklli yytsslhsgv psrfsgsgsg tdftltissl qpedfatyyc qqysklpwtf

121 gqgtkveikr tvaapsvfif ppsdeqlksg tasvvcllnn fypreakvqw kvdnalqsgn

181 sqesvteqds kdstyslsst ltlskadyek hkvyacevth qglsspvtks fnrgec*

**Protein sequences of variable domains (VH= variable heavy, VL= variable light) of different antibodies**

**MCSP (clone M4-3ML2):**

VH

1 qvqlqesgpg lvkpsqtlsl tctvsggsit sgyywnwirq hpgkglewig yitydgsnny

61 npslksrvti srdtsknqfs lklssvtaad tavyycadfd ywgqgtlvtv ss

VL

1 diqmtqspss lsasvgdrvt itcrasqgir nylnwyqqkp gkapklliyy tsslhsgvps

61 rfsgsgsgtd ftltisslqp edfatyycqq ysklpwtfgq gtkveikr

**IGF-1R (clone R1507):**

VH

1 qvelvesggg vvqpgrsqrl scaasgftfs sygmhwvrqa pgkglewvai iwfdgsstyy

61 adsvrgrfti srdnskntly lqmnslraed tavyfcarel grryfdlwgr gtlvsvss

VL

1 eivltqspat lslspgerat lscrasqsvs sylawyqqkp gqaprlliyd askratgipa

61 rfsgsgsgtd ftltisslep edfavyycqq rskwppwtfg qgtkveskr

**DP47 non-binding control:**

VH

1 evqllesggg lvqpggslrl scaasgftfs syamswvrqa pgkglewvsa isgsggstyy

61 adsvkgrfti srdnskntly lqmnslraed tavyycakgs gfdywgqgtl vtvss

VL

1 eivltqspgt lslspgerat lscrasqsvs ssylawyqqk pgqaprlliy gassratgip

61 drfsgsgsgt dftltisrle pedfavyycq qygsspltfg qgtkveikr

**CMV Peptide:**

1 nlvpmvatv

**EBV Peptide:**

1 glctlvaml

**BiTE:**

1 QVQLVQSGAE VKRPGASMKV SCKASGYTFT NYYIHWVRQA PGQGLEWMGW INPNSGATNY

61 AQKFQGRVTM TRDTSTSTVY MELSSLRSED TAVYYCAKSW VSWFASWGQG TLVTVSSGGG

121 GSGGGGSGGG GSELVMTQSP DSLAVSLGER ATINCKSSQS VLNSSNNRNY LAWYQQKPGQ

181 PPKLLIYWAS TRESGVPDRF SGSGSGTDFT LTISGLQAED VAVYYCQQHY STPFTFGPGT

241 KVDIKSGGGG SEVQLLESGG GLVQPGGSLK LSCAASGFTF NKYAMNWVRQ APGKGLEWVA

301 RIRSKYNNYA TYYADSVKDR FTISRDDSKN TAYLQMNNLK TEDTAVYYCV RHGNFGNSYI

361 SYWAYWGQGT LVTVSSGGGG SGGGGSGGGG SELVVTQEPS LTVSPGGTVT LTCGSSTGAV

421 TSGYYPNWVQ QKPGQAPRGL IGGTKFLAPG TPARFSGSLL GGKAALTLSG VQPEDEAEYY

481 CALWYSNRWV FGGGTKLTVL HHHHHH
